# Supplementary material for: Automated Detection of Cerebral Microbleeds on MR images using Knowledge Distillation Framework
Source: bioRxiv or medRxiv preprint supplement (doi:10.1101/2021.11.15.21266376), 2021-11-16
Supplement: Supplementary file [file media-1.pdf]

# Supplementary material - Automated Detection of Cerebral Microbleeds using Knowledge Distillation Framework

## 1 Comparison of existing patch-level CMB detection methods

Table S1: Comparison of the performance of the existing methods that were developed and evaluated at patch-level. Pl.TPR - patch-level TPR, Pl.Prec - patch-level precision, Pl.Acc - patch-level accuracy.

| Methods                                                 | Sequence(s)<br>(# test subjects) | Patch-size              | #<br>CMB/non-CMB<br>patches | CMB patches<br>detection<br>performance         |
|---------------------------------------------------------|----------------------------------|-------------------------|-----------------------------|-------------------------------------------------|
| Zhang et al., 2016 [1]<br>(10-fold<br>cross-validation) | SWI (5)                          | $20 \times 20$          | 30,478/30,711               | Pl.TPR - 93.2%,<br>Pl.acc - 93.22%              |
| Chen et al., 2018 [2]                                   | SWI (12)                         | $16 \times 16 \times 8$ | 377/1235                    | Pl.TPR - 94%,<br>FPavg - 11.7,<br>Cl.Prec - 72% |
| Zhang et al., 2018 [3]<br>(10-fold<br>cross-validation) | SWI (20)                         | -                       | 68,847/68,829               | Pl.TPR - 93.05%,<br>Pl.acc - 93.06%             |
| Zhang et al., 2018 [4]<br>(10-fold<br>cross-validation) | SWI (20)                         | $61 \times 61$          | 68,847/68,829               | Pl.TPR - 95.13%,<br>Pl.acc - 94.23%             |
| Hong et al., 2019 [5]<br>(10-fold<br>cross-validation)  | SWI (20)                         | $61 \times 61$          | 4287/4287                   | Pl.TPR - 95.7%,<br>Pl.acc - 97.4%               |
| Wang et al., 2019 [6]<br>(10-fold<br>cross-validation)  | SWI (20)                         | $61 \times 61$          | 10000/10000                 | Pl.TPR - 97.8%,<br>Pl.acc - 97.7%               |
| Lu et al., 2021 [7]<br>(5-fold<br>cross-validation)     | SWI (20)                         | $41 \times 41$          | 6407 / 6624                 | Pl.TPR - 98.27%,<br>Pl.acc - 98.60%             |

## References

- [1] Yu-Dong Zhang, Xiao-Xia Hou, Yi-Ding Lv, Hong Chen, Yin Zhang, and Shui-Hua Wang. Sparse autoencoder based deep neural network for voxelwise detection of cerebral microbleed. In *2016 IEEE 22nd International Conference on Parallel and Distributed Systems (ICPADS)*, pages 1229–1232. IEEE, 2016.
- [2] Yicheng Chen, Javier E Villanueva-Meyer, Melanie A Morrison, and Janine M Lupo. Toward automatic detection of radiation-induced cerebral microbleeds using a 3d deep residual network. *Journal of digital imaging*, pages 1–7, 2018.

- [3] Yu-Dong Zhang, Xiao-Xia Hou, Yi Chen, Hong Chen, Ming Yang, Jiquan Yang, and Shui-Hua Wang. Voxelwise detection of cerebral microbleed in cadasil patients by leaky rectified linear unit and early stopping. *Multimedia Tools and Applications*, 77(17):21825–21845, 2018.
- [4] Yu-Dong Zhang, Yin Zhang, Xiao-Xia Hou, Hong Chen, and Shui-Hua Wang. Seven-layer deep neural network based on sparse autoencoder for voxelwise detection of cerebral microbleed. *Multimedia Tools and Applications*, 77(9):10521–10538, 2018.
- [5] Jin Hong, Hong Cheng, Yu-Dong Zhang, and Jie Liu. Detecting cerebral microbleeds with transfer learning. *Machine Vision and Applications*, 30(7):1123–1133, 2019.
- [6] Shuihua Wang, Chaosheng Tang, Junding Sun, and Yudong Zhang. Cerebral micro-bleeding detection based on densely connected neural network. *Frontiers in neuroscience*, 13:422, 2019.
- [7] Si-Yuan Lu, Deepak Ranjan Nayak, Shui-Hua Wang, and Yu-Dong Zhang. A cerebral microbleed diagnosis method via featurenet and ensembled randomized neural networks. *Applied Soft Computing*, page 107567, 2021.
